# Supplementary material for: Miscibility and exchange chemical potential of ring polymers in symmetric ring–ring blends
Source: Royal Society of Chemistry journal article supplement (doi:10.1039/d3sm00108c), 2023-01-01
Supplement: d3sm00108c1.pdf [file d3sm00108c1.pdf]

## Supplementary Material (ESI) for Soft Matter

### Miscibility and exchange chemical potential of ring polymers in symmetric ring–ring blends

**Takahiro Ohkuma a), Katsumi Hagita b), Takahiro Murashima c), and Tetsuo Deguchi d)**

- a) *Digital engineering division, Bridgestone corporation, Kodaira, 187-8531, Japan*
- b) *Department of Applied Physics, National Defense Academy, 1-10-20, Hashirimizu, Yokosuka, 23908686, Japan*
- c) *Department of Physics, Tohoku University, 6-3, Aramaki-aza-Aoba, Aoba-ku, Sendai, 980-8578, Japan*
- d) *Department of Physics, Faculty of Core Research, Ochanomizu University, 2-1-1 Ohtsuka, Bunkyo-ku, Tokyo 112-8610, Japan*

The symmetric linear–linear blends and the symmetric ring–ring blends were modeled by the bead–spring model [1]. In the equilibration of the blends, we performed a long *NVT* simulation before the production runs. Mean squared displacements of beads normalized by the squared gyration radius of the polymers in the *NVT* runs are shown in Fig. S1 for the linear polymers and Fig. S2 for the ring polymers, respectively.

[1] K. Kremer and G. Grest, *J. Chem. Phys.* Vol. 92, p. 5057 (1990)

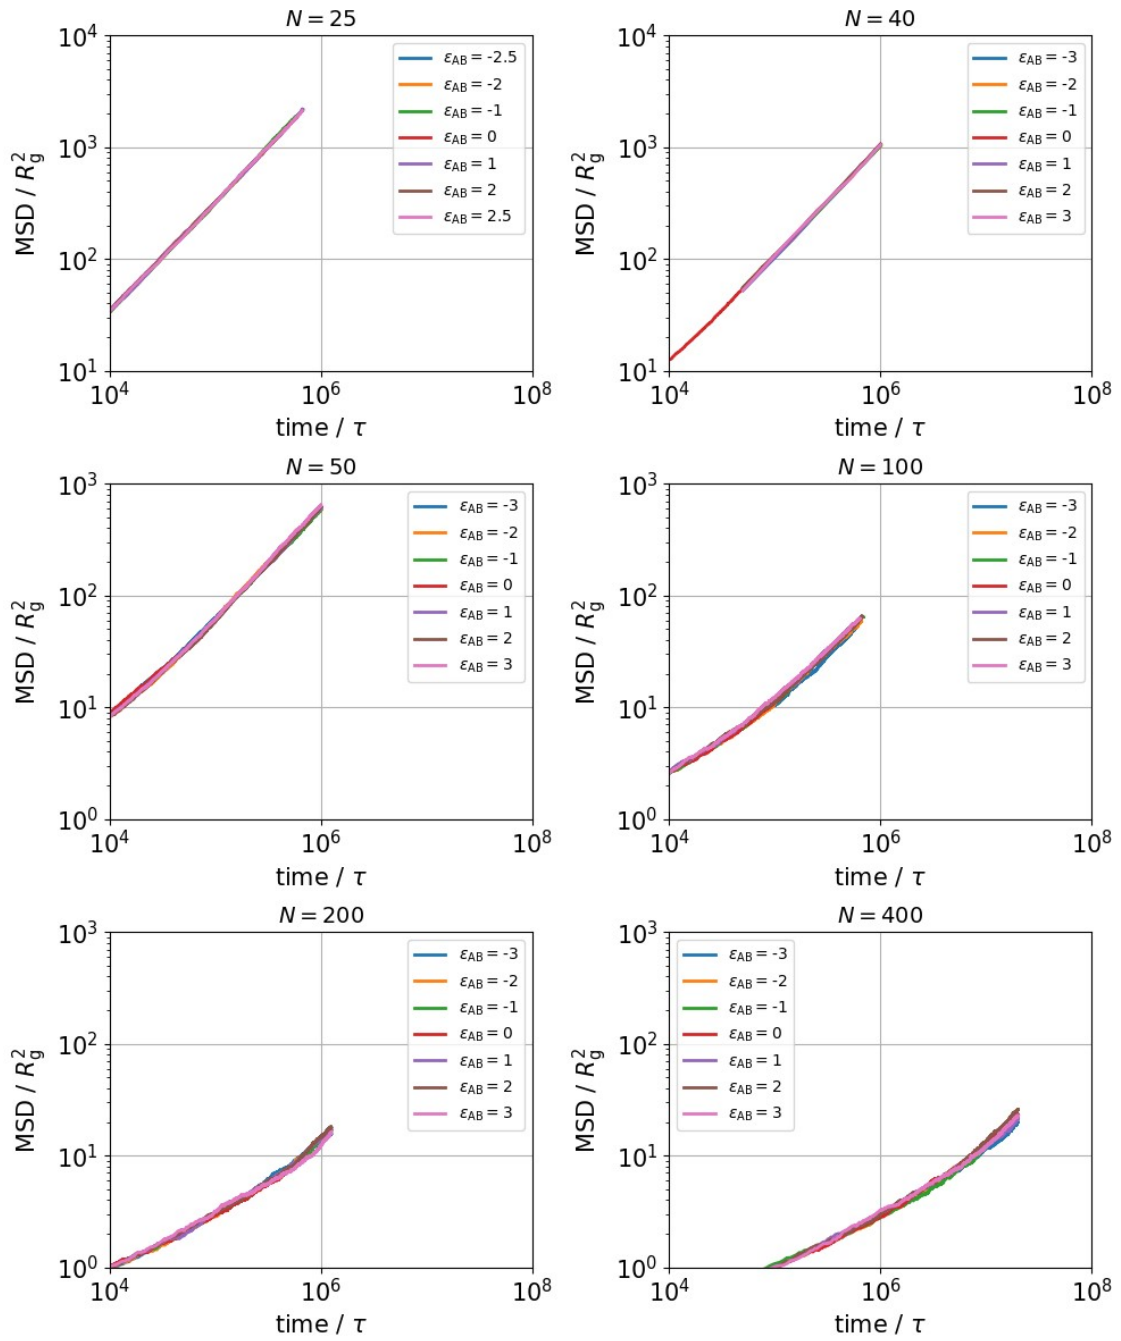

Fig. S1: Mean squared displacement divided by the squared gyration radius for the symmetric linear—linear blends of  $N=25, 40, 50, 100, 200$  and  $400$  and for several conditions of  $\epsilon_{AB}$ .

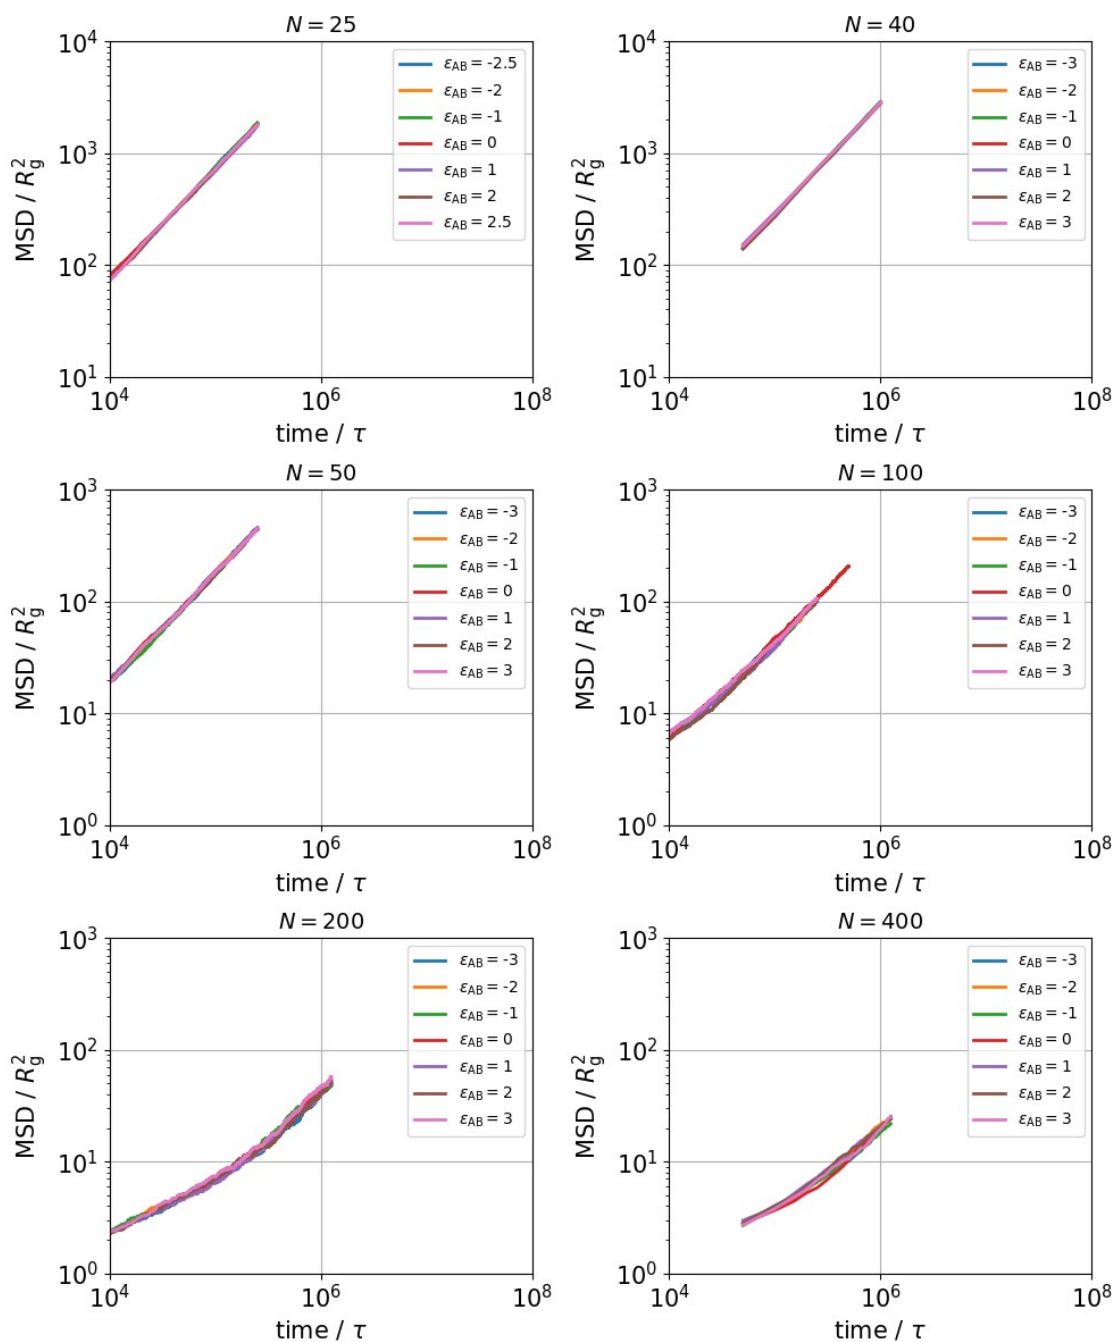

Fig. S2: Mean squared displacement divided by the squared gyration radius for the symmetric ring—ring blends of  $N=25, 40, 50, 100, 200$  and  $400$  and for several conditions of  $\epsilon_{AB}$ .
